# Supplementary material for: Three-year review of a capacity building pilot for a sustainable regional network on food, nutrition and health systems education in India
Source: HighWire-hosted journal article supplement (doi:10.1136/bmjnph-2020-000180), 2021-02-01
Supplement: bmjnph-2020-000180supp002_data_supplement.pdf [file bmjnph-2020-000180supp002_data_supplement.pdf]

### Constituents of Template Recipe Menu (Grams)

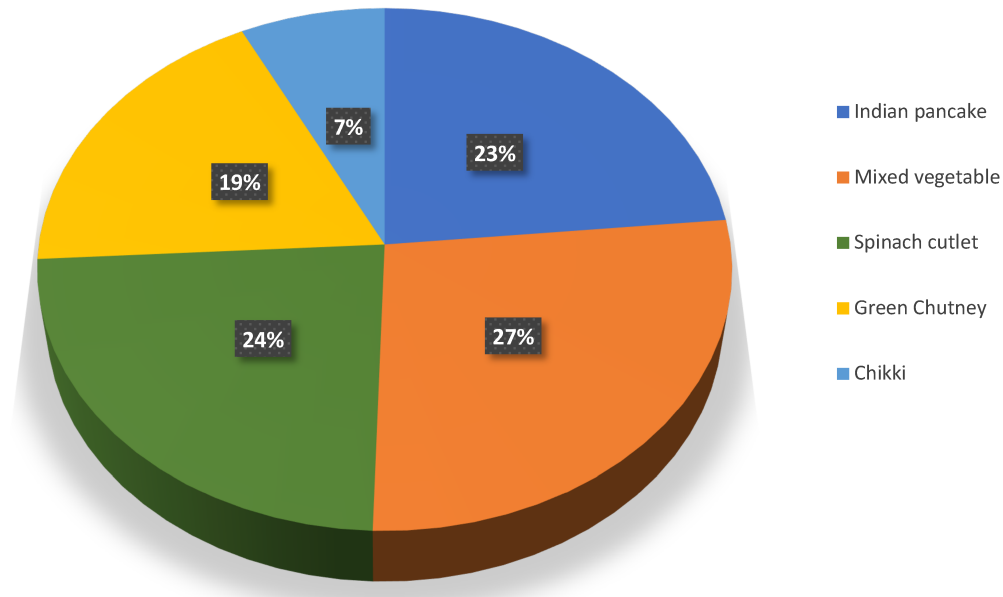

Approximate weights: Indian Pancake = 165g, Mixed Vegetable = 190g, Spinach Cutlet = 165g, Green Chutney = 130g, Chikki = 52g
